# Supplementary material for: De Novo Origination of a New Protein-Coding Gene in Saccharomyces cerevisiae
Source: Oxford University Press journal article supplement (doi:10.1534/genetics.107.084491), 2008-05-01
Supplement: supplementary_figure.pdf [file supplementary_figure.pdf]

Supplementary Figure 1A

|      |             |             |            |             |            |        |
|------|-------------|-------------|------------|-------------|------------|--------|
| Scer | GGCAATAATC  | GCAACACTAC  | AATTTT-GCC | GCTAAT--AT  | ATGT-CTATT | [ 50]  |
| Spar | .....       | ..G.TG...T  | .....-...  | .....--..   | G...-..G.A | [ 50]  |
| Smik | .A....T...  | A...T.T.TT  | G.....-... | ...G...--.. | G..C-..T.A | [ 50]  |
| Sbay | .A.....     | ..GGT...GT  | G.....T... | ...G----..  | G...A..TG. | [ 50]  |
| Scer | GTGCTACGGA  | AGAGTAACAA  | AAAAAACAAA | AACTGCATAA  | CAAGCAAGT- | [ 100] |
| Spar | A.T.....    | .A.....AC.  | .....TGT   | ..T.....    | .G.....T.- | [ 100] |
| Smik | A.T..G..C.  | ...-C.....  | G....C.... | ..A.TA....  | T..A...AAA | [ 100] |
| Sbay | AGCT....C.  | ...AA.GA..  | ..GTT.G... | .GT.....GC  | AC.....AG  | [ 100] |
| Scer | ---TTTATAC  | AATACACATT  | A-----     | -----       | TAAAA----- | [ 150] |
| Spar | ---.A.....  | .....A      | G-----     | -----       | ...G-----  | [ 150] |
| Smik | ---CA...G.  | G...T...C   | GGAG-----  | -----       | ...GTTATT  | [ 150] |
| Sbay | GAT.A.....  | .G.GG.G.C.  | GGAGAGCGCT | AGACACACTG  | ..T.GCCACA | [ 150] |
| Scer | -----ATTTC  | TACTCCGGTG  | TTCCGAGCTC | CCATTGCCAT  | TGGAGAAAGC | [ 200] |
| Spar | -----C..T   | CG...T.A..  | .C-...A..G | .....T...   | .....AT    | [ 200] |
| Smik | A-TCT.C..T  | C....A...   | CCG.TGA..G | T-G.....    | C.A....AT  | [ 200] |
| Sbay | AGTCTG..C.  | CG.....T..  | CC...GAA.T | A.....AT.   | .....GC.   | [ 200] |
| Scer | CCTTA--TGT  | GGAGTGGAGC  | TGCCTACAGG | TTGTTTTTCAG | GAAAGACATG | [ 250] |
| Spar | .....--...  | .....T      | .....G.... | ..A.....    | AG..A..G.. | [ 250] |
| Smik | .T...--.C.  | ...A.....T  | .A...G.... | -----       | -..T..TG.. | [ 250] |
| Sbay | TGC.GAG..C  | .....AC..T  | .ATG.G...C | -----       | -G.....    | [ 250] |
| Scer | GTTACAAAAA  | AG-ACGACAT  | TCGCC--A   | ACTTATCACT  | CGCTTGAACC | [ 300] |
| Spar | .....       | G.G..C.G..  | .....--T.  | G....CA...  | .....T.    | [ 300] |
| Smik | .....       | G.G..C.A..  | ..A.A.AGT. | ..G...TGT.  | ....AT..G. | [ 300] |
| Sbay | .....       | ..A..C.TGC  | ....TTACTC | ...GTATG..  | T.AC..CTTT | [ 300] |
| Scer | ACTTTTTTATG | CCAAGCCCTT  | AAACGCCGCG | AC--TC-AAA  | AACATACATA | [ 350] |
| Spar | -.C.....    | ...GA..T..  | C.....     | ..--C.C...  | .....A..G  | [ 350] |
| Smik | -.C.....    | T..GAT...-  | C.....     | ..--C.C...  | ...G...-G  | [ 350] |
| Sbay | T-.....     | ...GA.....  | T..G..G... | G.AAC.CC..  | ..A.C.A... | [ 350] |
| Scer | CTG---TGCC  | GCACGGCAGT  | TTTTGG--CG | CTATGACACC  | CTTTTCCCCA | [ 400] |
| Spar | ...AGTCA..  | ATGGT..T.G  | GCGCT.-T.. | ..G.CG.G.T  | G..CCTTT.C | [ 400] |
| Smik | .A.A--.ATT  | TTGA-.TC.C  | ACA.C.ATA. | ...CT...TT  | A...C.TT.. | [ 400] |
| Sbay | TACACGCAA.  | T.G.TTTGTG  | CCGAA.CAA. | GCGCT..G.T  | G.GCG.TA.C | [ 400] |
| Scer | AGAAAAT--C  | GCATATTAAC  | AACA-----  | ---AATTACC  | C-ATGCAACC | [ 450] |
| Spar | GAG...A--   | ...CGGC...  | .....      | ---.CAGT..  | --..ATG... | [ 450] |
| Smik | ..G..TA--   | ...CGGGT..  | G.A-----   | ---.C.GT..  | GA..ATG... | [ 450] |
| Sbay | G.....AGA.  | ...C.GC.G.  | T..TCATTTG | GGC..CA...  | GC.AA.GG.A | [ 450] |
| Scer | CAGGAAAAAA  | AAAATAGTCA  | TTATATACGT | AGTG-CGCTT  | TCA--TTG-- | [ 500] |
| Spar | -.AA.....   | .T..CC.CA.  | A.GGCAGT.A | .A..CAAT.A  | ...--...TA | [ 500] |
| Smik | -.AA.....T  | .....AGA.   | C.G--.GG.A | .AC.-AAG.A  | ...--C..TA | [ 500] |
| Sbay | -GTA.G.GGC  | G.GTG..GT.  | ..T.G....A | ..G.AAAGCC  | C..GC...GC | [ 500] |
| Scer | -ACAA---CT  | ACATTTTTTGT | G-CAACTTT- | -----TGTT   | -ACACCGCTA | [ 550] |

Spar T..G.AAG.C .A..CC..T. AA.....G.G TTTTGTG..C. -.T.A.CTAC [ 550]  
Smik T..G.AA-.A .A..CA..T. --.C...G.- -----..CA -.TT-.CT.C [ 550]  
Sbay CG.TGCGGTC GGTACGA.CA CAGC..AGCG TACTACTCAC. C..T..A.AC [ 550]

Scer CACGTATTGA AAGCGCAAAA GAC----- ---TATAGCT CCTCCAGCAG [ 600]  
Spar ACTCC.G..C ....ATT... A..GA-GCAA GGA..CC.TC .G.A...T.T [ 600]  
Smik GC.AC.AC.T .TA.TTT..- ----- -CCCA-- -----...T [ 600]  
Sbay ATTACG...C .CTTA..... CC.ATTACTG CAC.GCT.T. .AA.ACA..T [ 600]

Scer GGAAAACTCA CATCGGTGGG CAACAACAT- AGAATATGTC AAAGTTGTAA [ 650]  
Spar ATT.....T. ...G....C. ....G..C.- ..... .T.A...GG [ 650]  
Smik TT.G...GT. ...A....T. ....C .A.....CT .....G [ 650]  
Sbay TT.G.CGCT. -.CG....C. ....G.-..- G.....C... .....AGC [ 650]

Scer AAACACCCAC GAGTGCATAC CACTTTTCAA CATTACC--- -----GG [ 700]  
Spar ...G.TT..G T.....C.. .....TT ..A....CGG AACGTAGT.. [ 700]  
Smik C.GGTG.TGT T...T..... .GG...CGA AACCCAGT.. [ 700]  
Sbay C.GG...AGT C.AGAG.AG. GGG.ACC.GG -.GCG.A--- -----GT.. [ 700]

Scer GGAAAAAAA GTTTGCACCT CGTTCCCAGA AACATACGCA G-GAGTGA [ 750]  
Spar ..T.....G. .GC.....C TAC-..... ..G..... .CA..C..GA [ 750]  
Smik ..T...GG. AA.C.....G T..-G..... .TG.T... .CA..C.GGA [ 750]  
Sbay ..T.G...G. .GC.....C T.C-..... ..GC..... .C.G-..A. [ 750]

Scer GCGCT-AGTG ACAGATTGCT CTTTCCGTTG GAAAAAGAAA C---GACT- [ 800]  
Spar ....CG.-.. ..T...CT.C ...CT..C.. ..... .TAGC...G [ 800]  
Smik .AA.CC.... ..TA.....C ...C...CA. .... .TTGC.C.CG [ 800]  
Sbay .G..CTG... ..TA..C... .....GC. .... .GTGCTT.CA [ 800]

Scer -----TTT TTTCGCAA- ----- -AGTACCCGA [ 850]  
Spar TGTGCAT... .....A GCTGAAAAA AAAATGCAA A..... [ 850]  
Smik TGTGCAA... C.-.....- GCTGAAAAA AAA-TGCAA A...G.... [ 850]  
Sbay TTGGCA-... .....G GT---GAAAA AAAATGCAA A..GCGT... [ 850]

Scer AATCCTCGG- -AATTTTGCA AATAGTCGAT GATC----- ----ACAATT [ 900]  
Spar .....AT..G A..... ..A.T... ....GGTATT GAGC..TT.. [ 900]  
Smik .....CT..G A..G..... ..GA.TA.. ....AATATT GAGC...T.. [ 900]  
Sbay .....CT..G A..AG.C.A. .T.TA.T... ....AGTATT AGGTG.TT.. [ 900]

Scer -----GTTAG GTGACTATTT AACCAAGGACG GCGAGGAGAA CTGAAAAAAA [ 950]  
Spar -----..... ..TG..... ..A CG..A..... ..G..... [ 950]  
Smik -----..C.. ..TGT..... ..T.....A CG..A..... ..-..... [ 950]  
Sbay CTTTT...A ..TG..... ..A CG..A..... ..T-.G.G.. [ 950]

Scer AGCAACCTAT CCGGCCTCCT CTAGTTACAC AAA-CAAGAC AAAGAAATTG [1000]  
Spar ...G...C.. .T..TA---. T..T..... ..-...AG. ....G.C.. [1000]  
Smik .....C .T.TT---. T..T.A.... ..-AGGA.A ...A.GGC-- [1000]  
Sbay ..TTGT.C.A .T.C.TCTGG G..T..... ..A..GAG. C...C..GC. [1000]

Scer CATTGTCTAT AACGATAACA AAAGACATCG TATATATATA TATAT [1045]  
Spar G.CCAC..GC ...AG...G C..T....A ..C..----- ----- [1045]  
Smik -.C.C..GC ...A..T... C..T.T.C.. .----- ----- [1045]  
Sbay ..AC.C...C ..--.AC.T. T..T..GC.A ..C..----- ----- [1045]

Supplementary Figure 1B

|      |            |            |             |             |            |        |
|------|------------|------------|-------------|-------------|------------|--------|
| Scer | MSIVLRKSNK | KNKNCITSKF | YTIHIKIST   | PVFRAPIAIG  | ESPYVEWSCL | [ 50 ] |
| Spar | .CL*FYGKVN | .KTVIA*RAI | .IQYT*.DFR  | SDV.TA.V..  | .N.....    | [ 50 ] |
| Smik | .CL*FCARQQ | E.QKINNKQK | HMRYTSE*.Y  | YLLSLQCR*L  | CCHRRKSLSG | [ 50 ] |
| Sbay | .CTCSLRKKR | .S*KSCMHSK | RI.YSGDWRA  | LDTLYSHKSV  | PA.LPRNYIA | [ 50 ] |
|      |            |            |             |             |            |        |
| Scer | QVFRKDMVT  | KKTTFAQLIT | RLNHFLCQAL  | KRRDSKTYIL  | CRTAVFGAMT | [100]  |
| Spar | ..I..ENV.. | .RDQIRPSLQ | LA*IIFMPD.  | STPRPQKHKC  | *V.M.L..VA | [100]  |
| Smik | MELPAGM.WL | Q.G.KFTQ*R | IVRYKHFYVR  | SSTPRPQKRC  | RYFESHIDSY | [100]  |
| Sbay | FGEAC*VRS. | VMCEDMVTK  | KNHAR.LTVC  | LTAFFLCQT.  | *GGGNPKKQI | [100]  |
|      |            |            |             |             |            |        |
| Scer | PFSPRKSHIN | NKLPMQPRKK | KIVIIYVVRF  | H*QLHFCATF  | GTPLHVLKAQ | [150]  |
| Spar | VALFLSEKST | ATTTVHMT.. | ..TANGSEMQ  | LSLYTKAKS.  | *QLCFCAITY | [150]  |
| Smik | YIISF.EYAR | VRKLSEYDQ. | .*NKNCGK.S  | ITVYETKSFS  | TVAIPSPQRI | [150]  |
| Sbay | YTQLALCRSK | ALRCAL.E.D | AQQLLIWATT  | ANGSKRRVRY  | FVRRESPSLA | [150]  |
|      |            |            |             |             |            |        |
| Scer | KTIAPPAGKT | HIGGQQHRIC | QSCKNTHECI  | PLFNITGEKK  | VCTSPFETYA | [200]  |
| Spar | TPVQALKTSK | DTVRTVY*TY | MGAQRPRI.H  | NCGK.Q*CTP  | LFFNTRNVVG | [200]  |
| Smik | L*PSI*NVHR | CATTSKYAKV | VAGAVSSYHF  | STVPE.QWG.  | RKSHRVPEMF | [200]  |
| Sbay | AAVGTITAQR | TLTHST.YVA | LTKPI.ALLF  | NTHLDANGCA  | TNGIRQS*AR | [200]  |
|      |            |            |             |             |            |        |
| Scer | GVTALVTDCS | FRWKKKRLFF | AKVPEILGIL  | QIVDDHNC*V  | TI*QGRRGEL | [250]  |
| Spar | *KE.APYPRN | V.S.RE.R*L | ISLLAGKRN*  | RLCAFFSQKL  | KKKMQKVP.I | [250]  |
| Smik | AASGRTQ*LI | ALPAG..NLR | PCAISRKAEK  | KMQKVPEIPG  | KVCK*LMINI | [250]  |
| Sbay | TSQEKRVPGA | QWGR.RLHPA | PETHAAGNGP  | GD*SLFPAEK  | ETCFHWHFFA | [250]  |
|      |            |            |             |             |            |        |
| Scer | KKKQPIRPPL | VTQTRQRNCI | VYNDNKRHRI  | YIY-----    | -----      | [300]  |
| Spar | HG.FCK*LMI | GIEHFC*VA. | *QGHGRELEK  | KRPIWYLEFTQ | TKQRDWTTCN | [300]  |
| Smik | EHICQVVI** | GHGRELKKSN | LPVFINTK GK | KRHRLQQLHN  | IP-----    | [300]  |
| Sbay | .V.KNAKRRR | NPWEKSKFID | DQY*VLFFC*  | VAI*QGHGRE  | LRESCPTASG | [300]  |
|      |            |            |             |             |            |        |
| Scer | -----      | -----      | [320]       |             |            |        |
| Spar | SNAIHHT--- | -----      | [320]       |             |            |        |
| Smik | -----      | -----      | [320]       |             |            |        |
| Sbay | YLHKTEPSKR | NAYKTYNTPY | [320]       |             |            |        |
