# Supplementary material for: De Novo Origination of a New Protein-Coding Gene in Saccharomyces cerevisiae
Source: Oxford University Press journal article supplement (doi:10.1534/genetics.107.084491), 2008-05-01
Supplement: supplementary_figure_legends-ww.doc [file supplementary_figure_legends-ww.doc]

Supplementary figure legends

Supplementary Figure 1. Alignments of DNAs and putative peptides of the corresponding intergenic *BSC4* regions betweem *ALP*1 and *LYP*1 among the closely related species of the baker’s yeast. A. Alignment of the whole intergenic region betweem *ALP*1 and *LYP*1 among species. B. *In silico* translation of the intergenic region from the start codon. "." stands for identical amino acid, "*" stands for stop codon, "-" stands for gap. We can see that there are several premature start codons before the position of the first stop codon in non- *S. cerevisiae* species. Sbay, *Saccharomyces. bayanus*; Smik, *S. mikatae*; Spar, *S. paradoxus*; and Scer, *S. cerevisiae*.
